# Supplementary material for: A novel metabolism-based phenotypic drug discovery platform in zebrafish uncovers HDACs 1 and 3 as a potential combined anti-seizure drug target
Source: PubMed Central journal article supplement — Brain. 2018 Jan 24;141(3):744–61. doi: 10.1093/brain/awx364 (PMC5837409; doi:10.1093/brain/awx364), 2018-01-24
Supplement: awx364_brain-2017-00521-file009.pdf [file awx364_brain-2017-00521-file009.pdf]

## Supplementary Materials

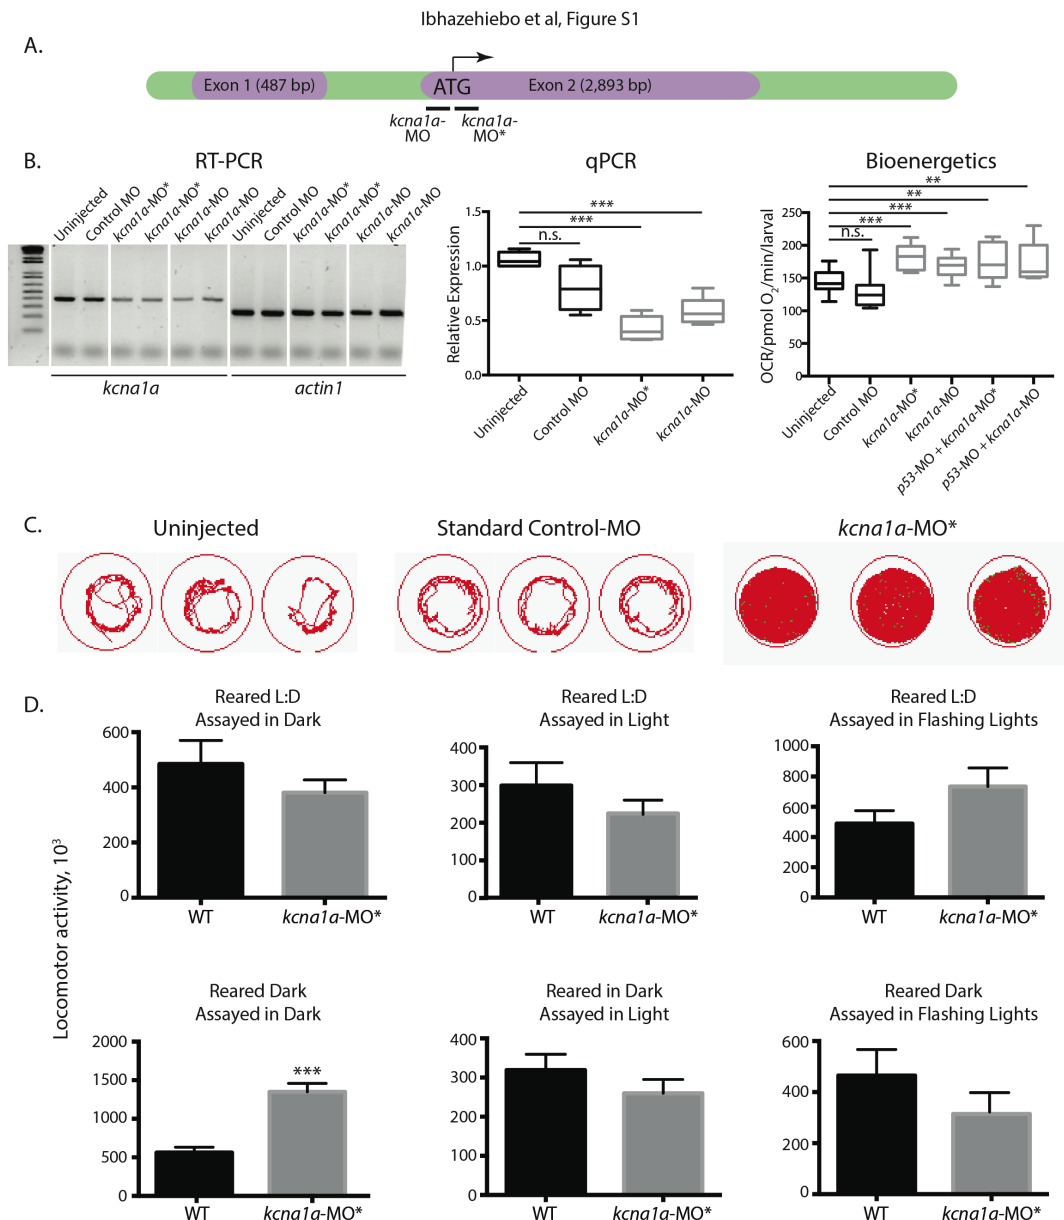

**Fig. S1. *Kcna1*-MO zebrafish display hyperexcitable phenotypes.** (A) Cartoon representation of the *kcna1a* gene, with the location of the two ATG-blocking morpholinos depicted. *Kcna1a*-MO\* is the MO used throughout this paper. (B) The effects of two, non-overlapping *kcna1a*-MOs on endogenous *kcna1a* transcript levels are shown first by RT-PCR and then quantitatively by qPCR. Additionally, the specificity of these two *kcna1a*-MOs +/- co-injection of p53-MO is tested in the bioenergetic assay on 3 dpf injected larvae. Both *kcna1a*-MOs when co-injected with a p53-MO display the same phenotype as when injected alone, suggesting that the phenotype of the *kcna1a*-MOs are not due to off target effects on apoptosis. (C) Representative scribes showing hyperactivity of larval (5 dpf) *kcna1a*-MO\* epileptic fish relative to WT. (C) Representative data showing *kcna1a*-MO\* zebrafish exhibit hyperactivity only compared to WT when reared in dark and assayed in dark, compared to other conditions of rearing and assay. Data in (D) is shown as mean  $\pm$  SEM; \*\*\* $P$  < 0.0001 (unpaired t test);  $n$  = 24 fish per group.

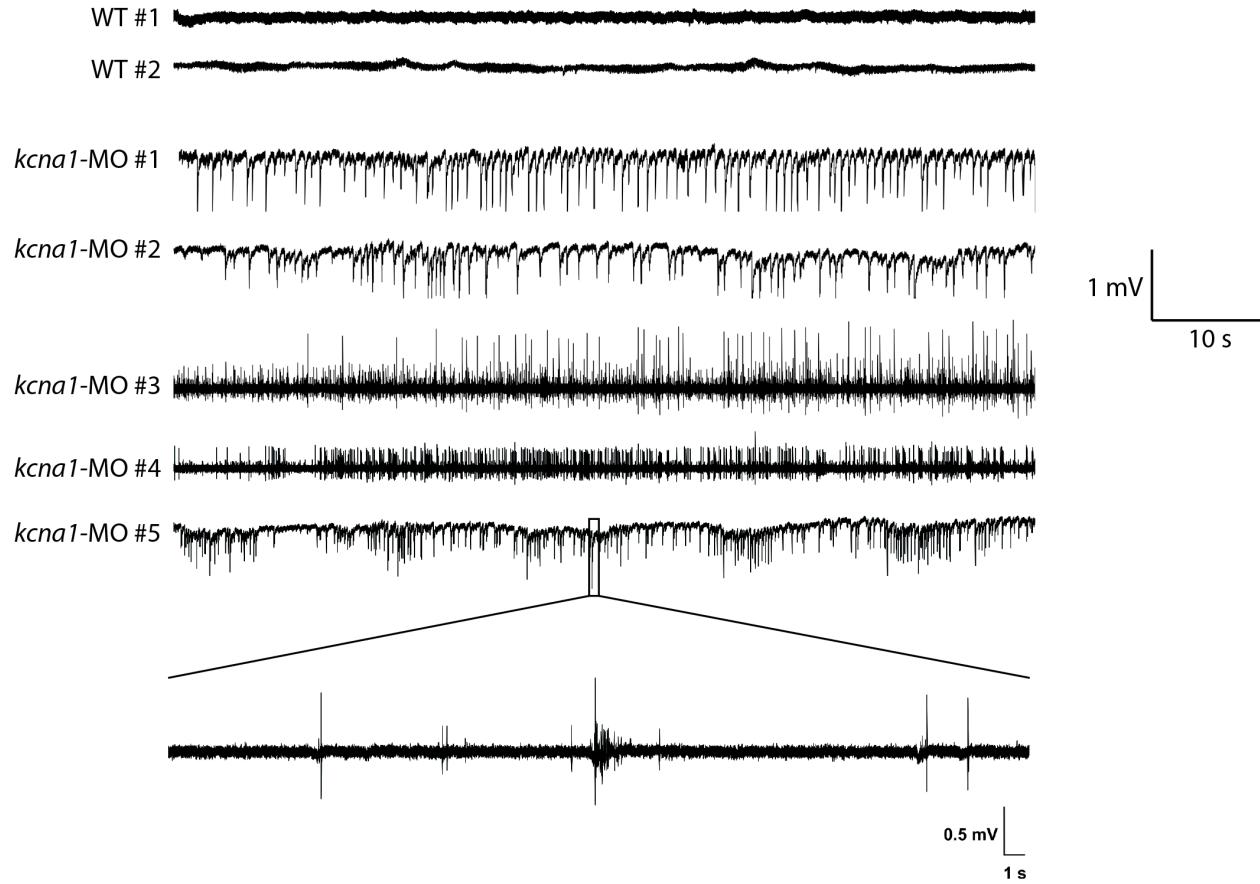

Fig. S2. ***Kcna1*-MO zebrafish display hyperexcitable phenotypes based on EEG.**

Representative extracellular field recording obtained from the tectum of 6 dpf zebrafish larvae in current clamp mode. The presence of high frequency, large amplitude spikes indicative of hyperexcitability in *kcna1*-MO animals is shown. Here, we define epileptiform events as upward or downward deflections greater than 2x baseline levels. A zoomed in view shows ictal- (>1000 ms in duration) and inter-ictal (<300 ms duration) like activity, consistent with epileptiform events.

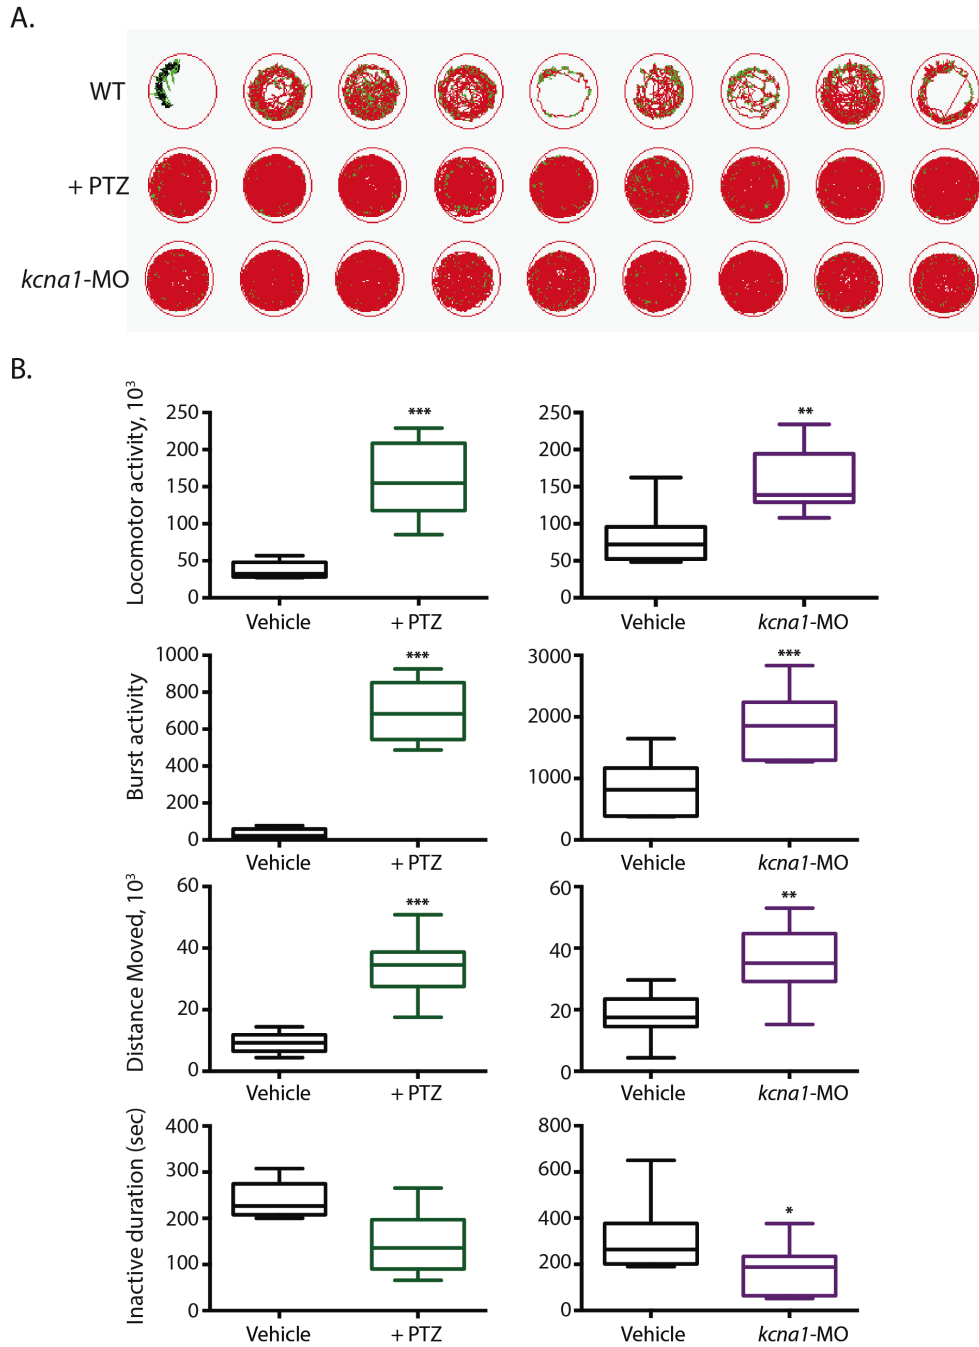

**Fig. S3. *kcna1*-MO zebrafish behavioral analyses.** (A) Representative scribes showing equal levels of hyperexcitability in larval 5pdf *kcna1*-MO and PTZ induction models of epilepsy compared to WT. (B) PTZ-induction and *kcna1*-MO models of epilepsy exhibit comparable behavioral phenotypes. In both models, total locomotor activity, burst activity, distance moved and inactive duration are comparatively similar. Data in (C) is shown as mean  $\pm$  SEM; \* $P$  < 0.05, \*\* $P$  < 0.001, \*\*\* $P$  < 0.0001 (unpaired t test);  $n$  = 24 fish per group.

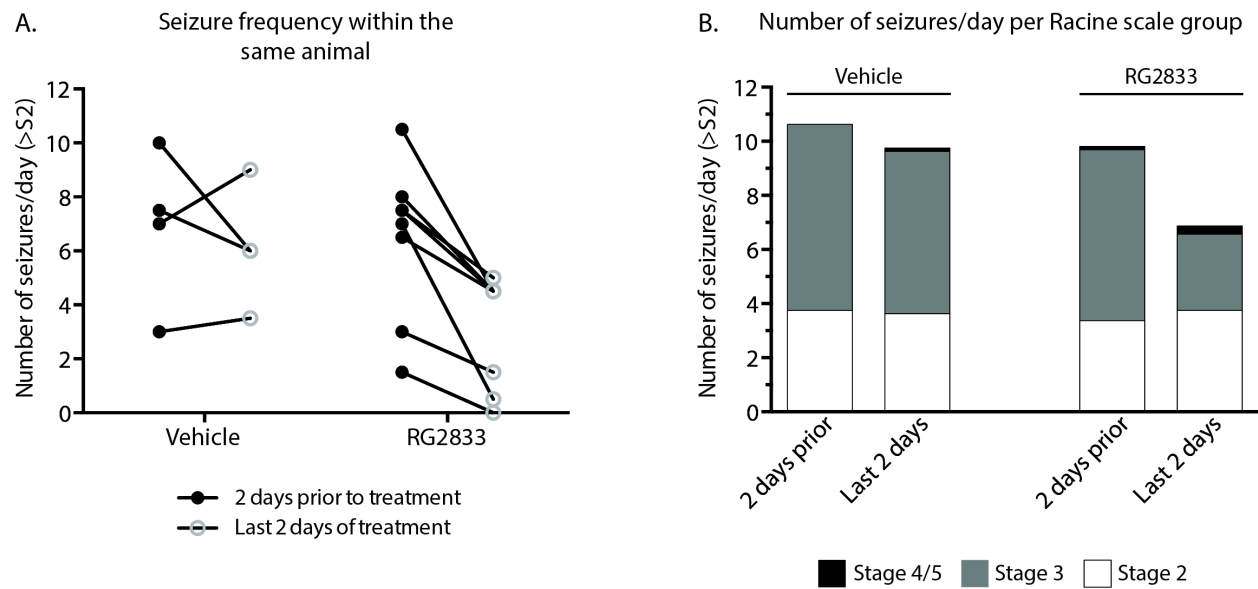

**Fig. S4. Inhibition of HDAC 1, 3 decreases seizures in *Kcna1*-null mice.** (A) Seizure frequency is decreased within the same animal from baseline levels (2 days prior to treatment) to the last 2 days of treatment in RG2833-treated (100 mg/kg/bw/day) animals. No overall change in seizure frequency is observed in vehicle-treated animals. (B) Treatment with RG2833 (100 mg/kg/bw/day) specifically decreased Stage 3 seizures, as per a modified Racine scale scoring (21). n = 4-8 animals per group.
